# Supplementary material for: Imbalance of Th17, Treg, and helper innate lymphoid cell in the peripheral blood of patients with rheumatoid arthritis
Source: PubMed Central journal article supplement (PMC9652246; doi:10.1007/s10067-022-06315-8), 2022-08-04

## Supporting Information for

### *Imbalance of Th17, Treg, and Helper innate lymphoid cell in the peripheral blood of patients with rheumatoid arthritis*

Ting Wang<sup>1,2♦</sup>, Jinbing Rui<sup>3♦</sup>, Wenqi Shan<sup>1</sup>, Fei Xue<sup>1</sup>, Dingqi Feng<sup>1</sup>, Liyang Dong<sup>1,4</sup>, Jiahui Mao<sup>1</sup>, Yang Shu<sup>1</sup>, Chaoming Mao<sup>4</sup>, Xuefeng Wang<sup>1,4\*</sup>

<sup>1</sup> Department of Central Laboratory, The Affiliated Hospital of Jiangsu University, Zhenjiang 212001, China;

<sup>2</sup> Department of Clinical Laboratory, The Affiliated Hospital of Jiangsu University, Zhenjiang 212001, China;

<sup>3</sup> Department of Rheumatology, The Affiliated Hospital of Jiangsu University, Zhenjiang 212001, China;

<sup>4</sup> Department of Nuclear Medicine and Institute of Oncology, The Affiliated Hospital of Jiangsu University, Zhenjiang 212001, China;

♦ These authors contributed equally to this work.

\*Correspondence to: Xuefeng Wang, Department of Central Laboratory, The Affiliated Hospital of

Jiangsu University, 438 Jiefang Road, Zhenjiang 212001, China. Phone: +86-0511-8502-1135; E-mail:

xuefengwang@ujs.edu.cn; ORCID: 0000-0002-5980-6530

**Table S1** Characteristics of patients with RA and healthy controls

| Demographics                              | RA patients (n = 86)    | Healthy (n = 50)     | p value |
|-------------------------------------------|-------------------------|----------------------|---------|
| Age (years) - mean $\pm$ SEM              | 55.43 $\pm$ 1.46        | 51.46 $\pm$ 1.40     | 0.0721  |
| Sex - female/male                         | 12/74                   | 10/40                | >0.999  |
| RF - median (range)                       | 54.90 ( 23.03 - 200.3 ) | -                    | -       |
| ACPA - median (range)                     | 234.10 ( 37.18 - 800 )  | -                    | -       |
| ESR (mm/h) - median (range)               | 25.00 ( 12.50 - 51.00 ) | 4.20 ( 2.45 - 6.90 ) | <0.0001 |
| CRP (mg/L) - median (range)               | 6.30 ( 2.25 - 16.35 )   | 0.50 ( 0.50 - 1.23 ) | <0.0001 |
| Disease duration (years) - median (range) | 6.00 ( 1.25 - 10.00 )   | -                    | -       |
| DAS28 - median (range)                    | 3.12 ( 2.35 - 4.11 )    | -                    | -       |

*RF*, rheumatoid factor; *ACPA*, anti-citrullinated protein antibodies; *ESR*, erythrocyte sedimentation rate; *CRP*, C-reactive protein; *DAS28*, disease activity score in 28 joints.

**Figure S1 Gating strategies for the identification of ILCs.** Isolated cells were pre-gated on  $LIN^{-}(CD3^{-}CD19^{-}CD56^{-})$  cells, then total ILCs ( $CD3^{-}CD19^{-}CD56^{-}CD127^{+}$ ), ILC1s ( $LIN^{-}CD294^{-}CD117^{+}$ ), ILC2s ( $LIN^{-}CD294^{+}$ ), and ILC3s ( $LIN^{-}CD294^{-}CD117^{+}$ ) in a representative sample.

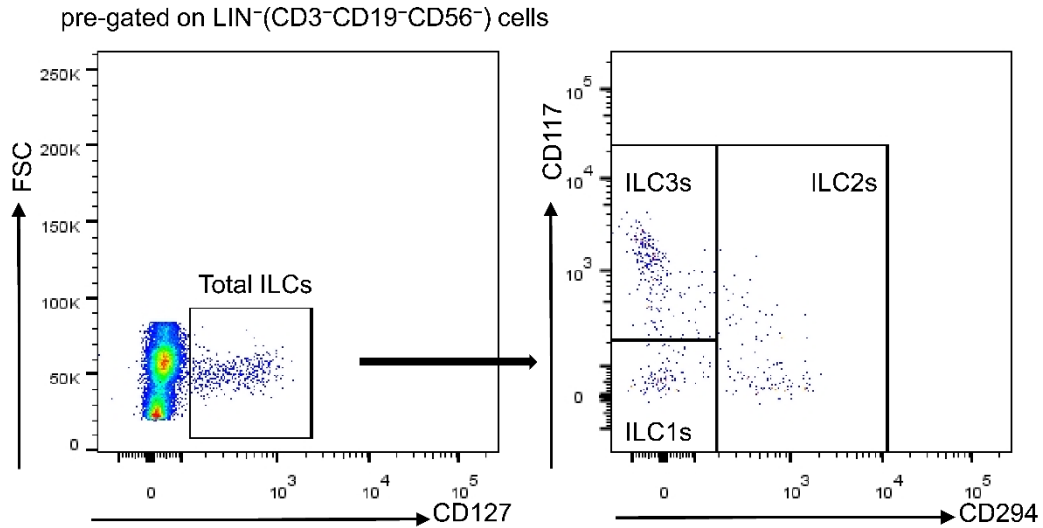

**Figure S2 Differences in ESR, CRP, and RF among HC and RA patients with different disease activity status.** (a)ESR, (b) CRP, (c) RF. Results are presented as mean  $\pm$  SEM. \*  $P < 0.05$ , \*\*  $P < 0.01$ .

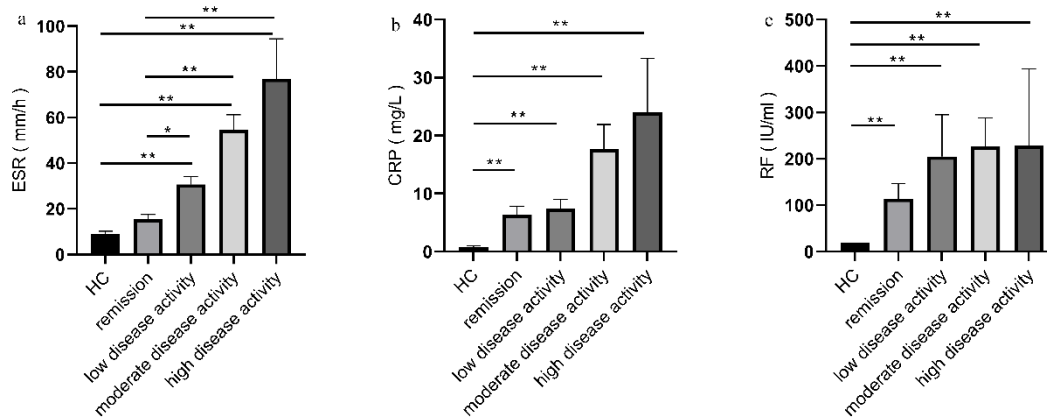

**Figure S3. Cytokine analysis in sera by ELISA in HC, RF<sup>-</sup>, and RF<sup>+</sup> RA patients.**

(a) IFN- $\gamma$ , (b) IL-4, (c) IL-10, (d) IL-17A, (e) IL-22, and (f) IL-33. Results are presented as mean  $\pm$  SEM. \*  $P < 0.05$ , \*\*\*\*  $P < 0.0001$ .

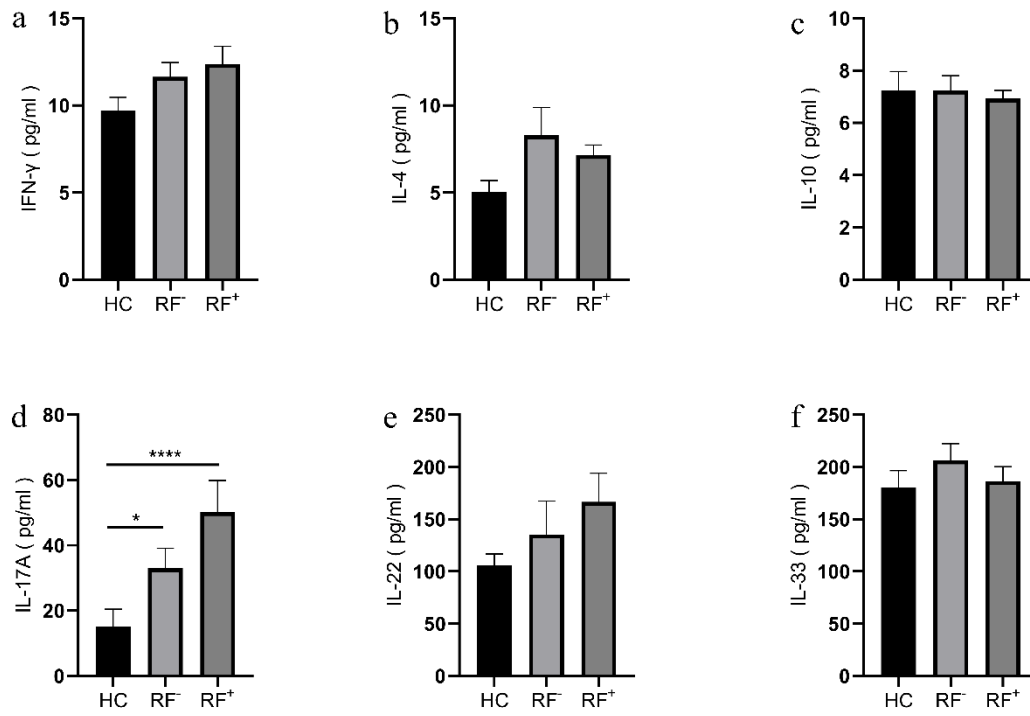

**Figure S4. Cytokine analysis in sera by ELISA in HC, ACPA<sup>-</sup>, and ACPA<sup>+</sup> RA patients.**

(a) IFN- $\gamma$ , (b) IL-4, (c) IL-10, (d) IL-17A, (e) IL-22, and (f) IL-33. Results are presented as mean  $\pm$  SEM. \*  $P < 0.05$ , \*\*\*\*  $P < 0.0001$ .

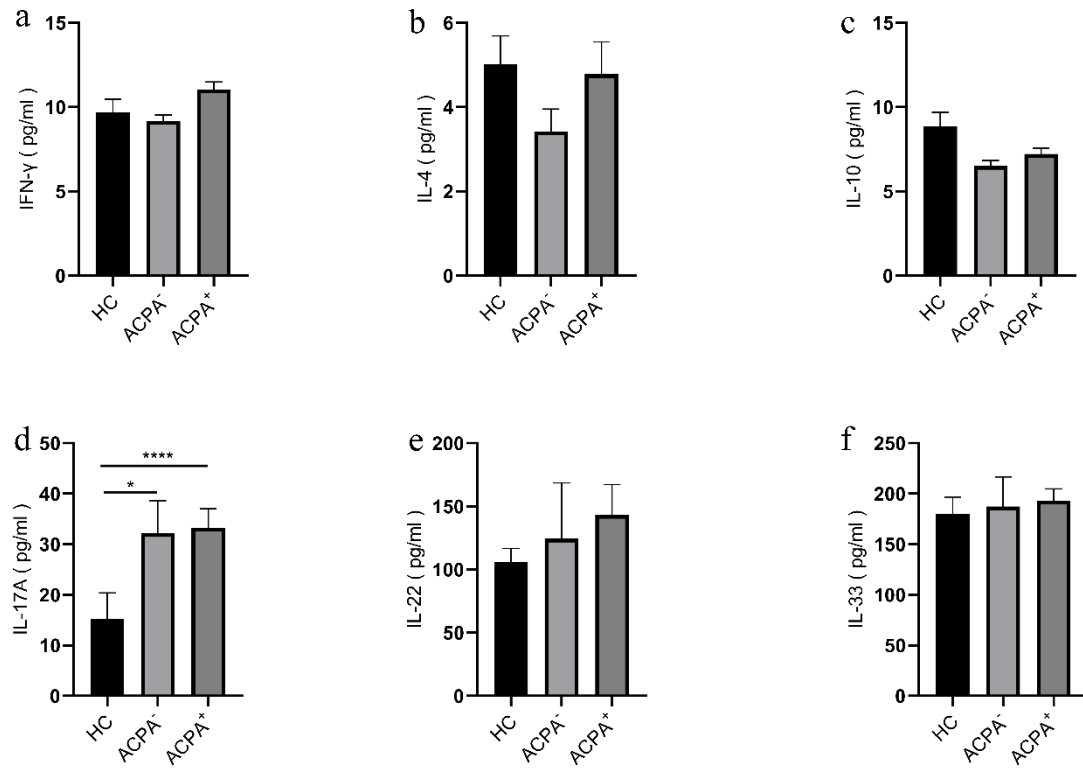

Supplement: 10067_2022_6315_MOESM1_ESM.pdf [file 10067_2022_6315_MOESM1_ESM.pdf]
